# Supplementary material for: Promotion of Plant Growth in Arid Zones by Selected Trichoderma spp. Strains with Adaptation Plasticity to Alkaline pH
Source: MDPI journal article supplement (doi:10.3390/biology11081206), 2022-08-12
Supplement: s1 [file s1]

**Table S1: Primers used as molecular markers for fungi**

| <b>Code</b>      | <b>Sequence 5' - 3'</b> | <b>Reference</b> |
|------------------|-------------------------|------------------|
| <i>EF1 728f</i>  | CATCGAGAAGTTCGAGAAGG    | [29]             |
| <i>EF1 1281r</i> | AACTTGCAGGCAATGTGG      | [29]             |
| <i>ITS 1</i>     | TCCGTAGGTGAACCTGCGG     | [47]             |
| <i>ITS 4</i>     | TCCTCCGCTTATTGATATGC    | [47]             |
| <i>LROR</i>      | ACCCGCTGAACTTAAGC       | [48]             |
| <i>LR5</i>       | TCCTGAGGGAAACTTCG       | [48]             |
| <i>Bsens</i>     | ATCACWCACTCICTIGGTGGTGG | [48]             |
| <i>Brev</i>      | CATGAAGAARTGIAGACGIGGG  | [48]             |
| <i>ACT 512f</i>  | ATGTGCAAGGCCGGTTTCG     | [49]             |
| <i>ACT 783r</i>  | TACGAGTCCTTCTGGCCCAT    | [49]             |
